# Supplementary material for: Double-network hydrogels with adjustable surface morphology and multifunctional integration for flexible strain sensors
Source: Royal Society of Chemistry journal article supplement (doi:10.1039/d1sm00158b), 2021-01-01
Supplement: d1sm00158b1.pdf [file d1sm00158b1.pdf]

**Electronic Supplementary Information for**

**Double-network hydrogel with adjustable surface morphology and  
multifunctional integration for flexible strain sensors**

*Yang Yu, Fengjin Xie, Xinpei Gao\* and Liqiang Zheng\**

Key Laboratory of Colloid and Interface Chemistry, Shandong University, Ministry of  
Education, Jinan, 250100, P. R. China.

\*Corresponding author: Liqiang Zheng E-mail address: [lqzheng@sdu.edu.cn](mailto:lqzheng@sdu.edu.cn)

Xinpei Gao E-mail address: [gaoxinpei@mail.sdu.edu.cn](mailto:gaoxinpei@mail.sdu.edu.cn)

**Table S1.** Sample composition in weight percentage of the studied DN hydrogels

| <b>PIL<br/>(wt%)</b> \ <b><math>\kappa</math>-carrageenan<br/>(wt%)</b> | <b>1</b> | <b>2</b> | <b>3</b> |
|-------------------------------------------------------------------------|----------|----------|----------|
| <b>5</b>                                                                | K1-P5    | K2-P5    | K3-P5    |
| <b>10</b>                                                               | K1-P10   | K2-P10   | K3-P10   |
| <b>15</b>                                                               | K1-P15   | K2-P15   | K3-P15   |
| <b>20</b>                                                               | K1-P20   | K2-P20   | K3-P20   |

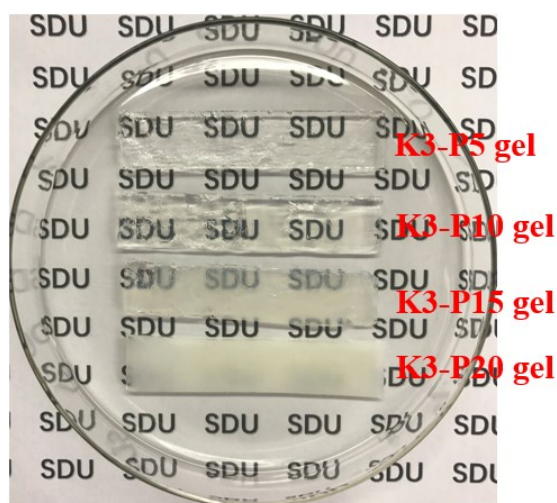

**Fig. S1** The appearance of obtained  $\kappa$ -carrageenan/PIL DN hydrogels.

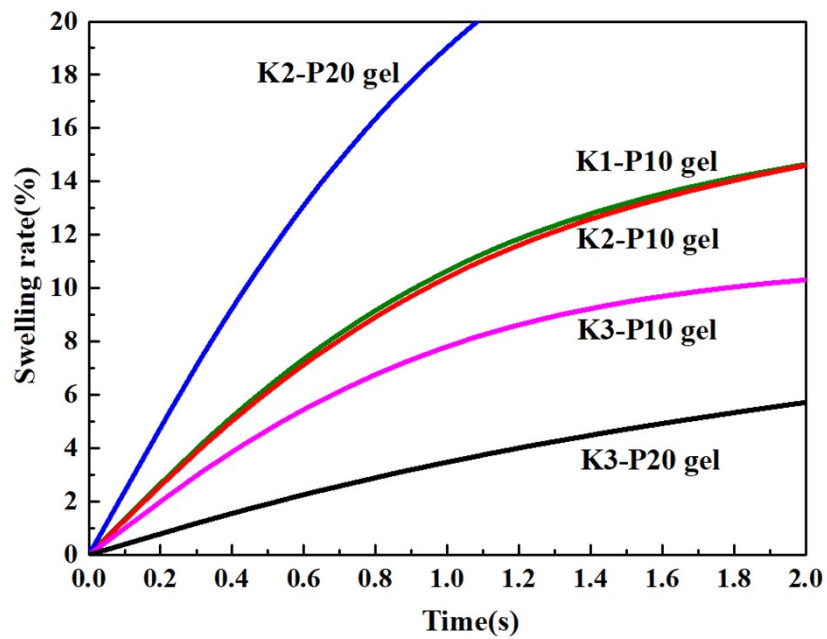

**Fig. S2** The swelling rate in the initial stage for different hydrogel samples.

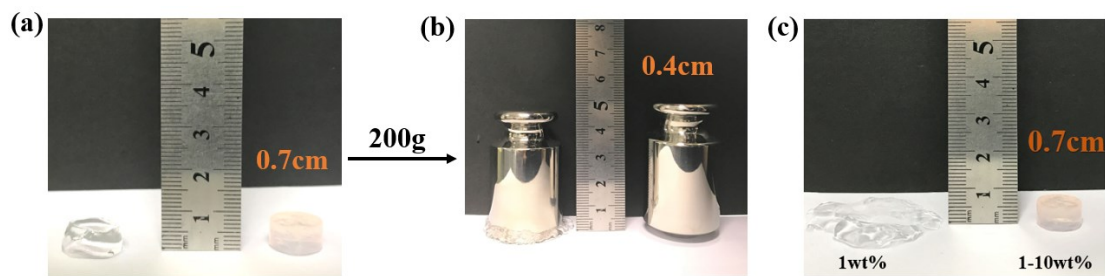

**Fig. S3** Load-bearing capacity tests of K1 and K1-P10 hydrogels (the weight is 200g).

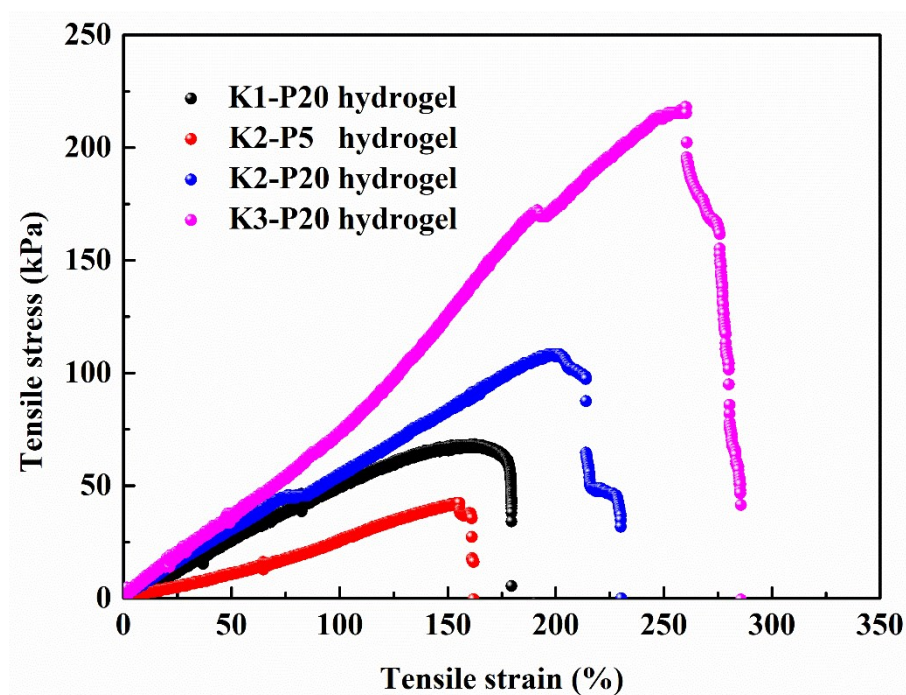

**Fig. S4** Strain stress-strain curves of different hydrogels.

a

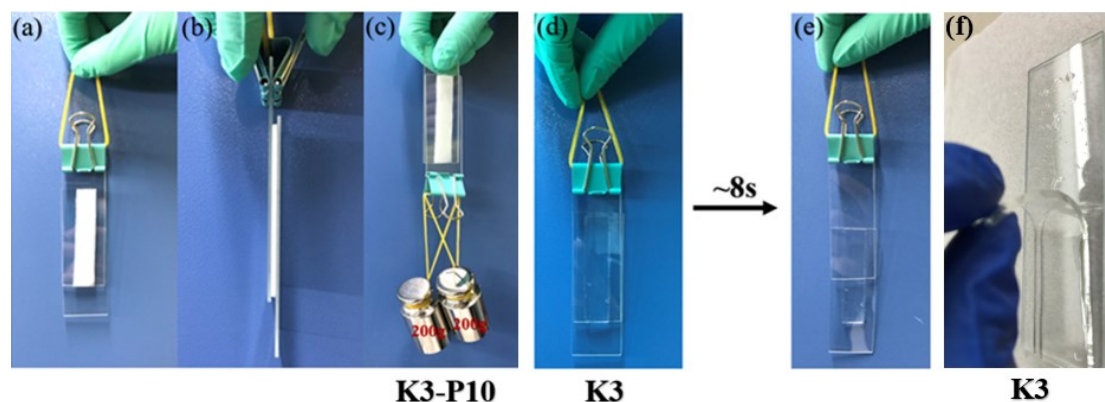

**Fig. S5** (a-c) Schematic of static shear test of the K3-P10 DN hydrogel adhesion on glass substrates and 400 g hanging weight. (d-e) Illustration of the K3 hydrogel adhesion on glass, and the glass slides will slide off without the weight hanging. (f) The K3 hydrogel is peeled from the glass plate with water left.

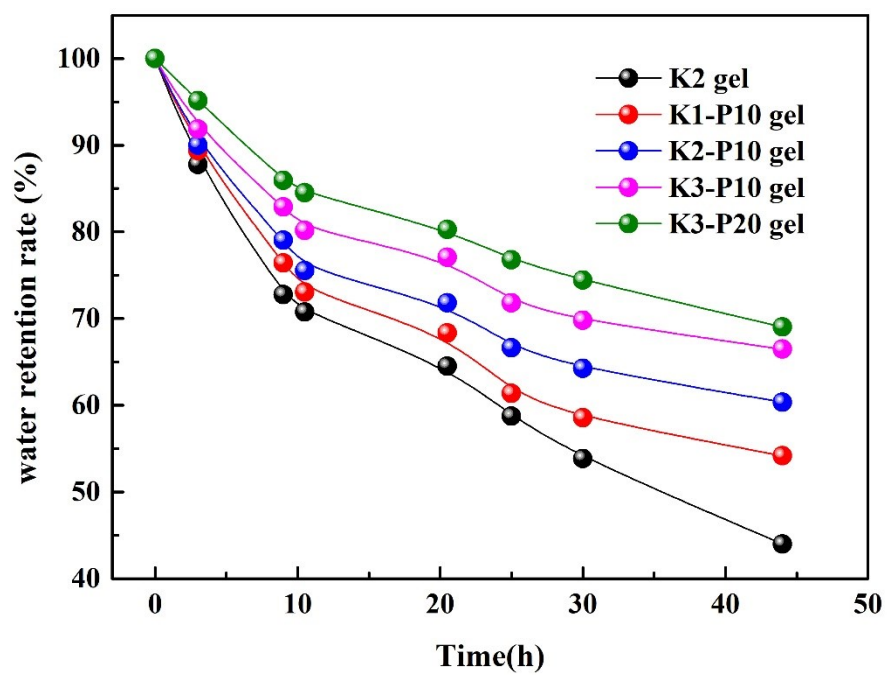

**Fig. S6** Plot of water retention rate (%) versus time for different hydrogel samples.

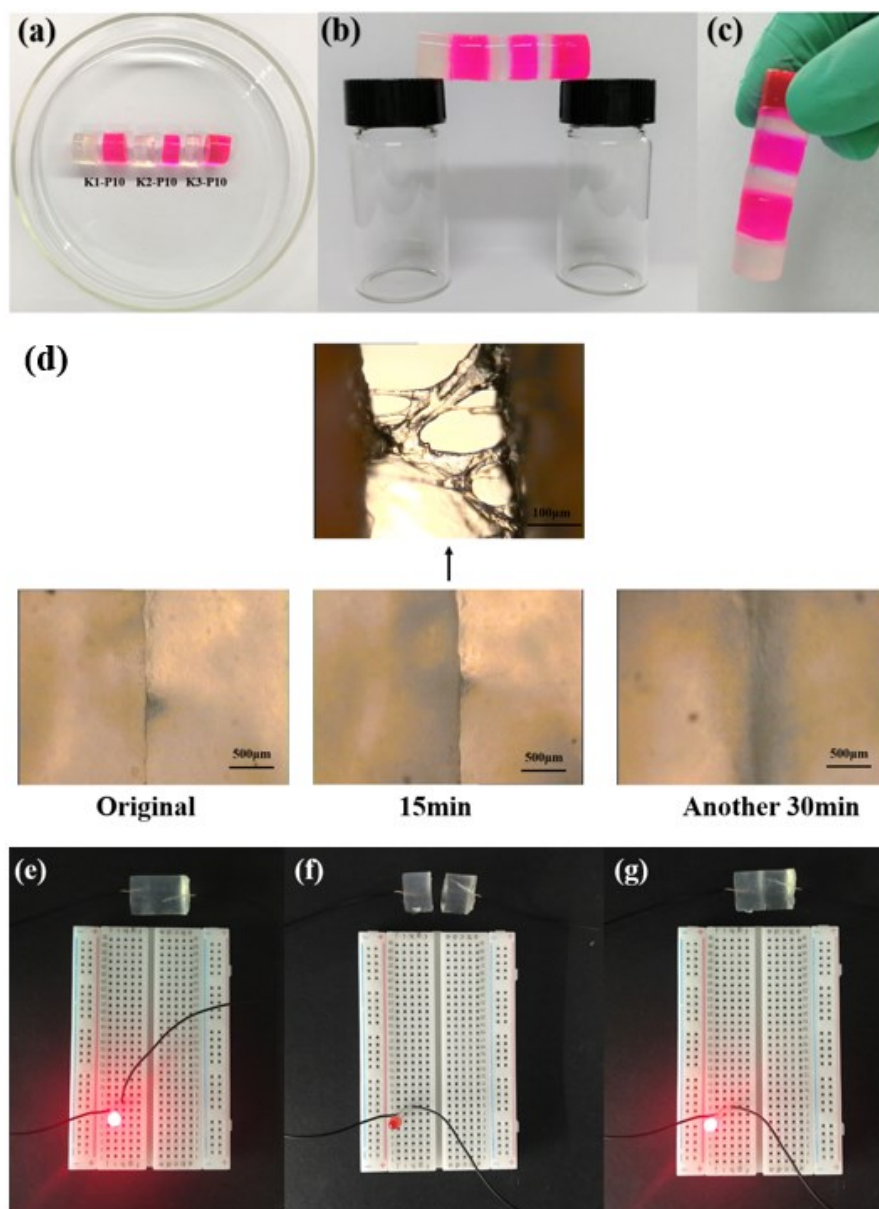

**Fig. S7** (a-c) Self-healing process of K1-P10, K2-P10, and K3-P10 hydrogels. (d) Self-healing process of 1-15 hydrogel under optical microscope. (e-g) Circuit comprises an LED indicator connected by (e)undamaged, (f)cut, and (g)self-healed K3-P10 hydrogel column.

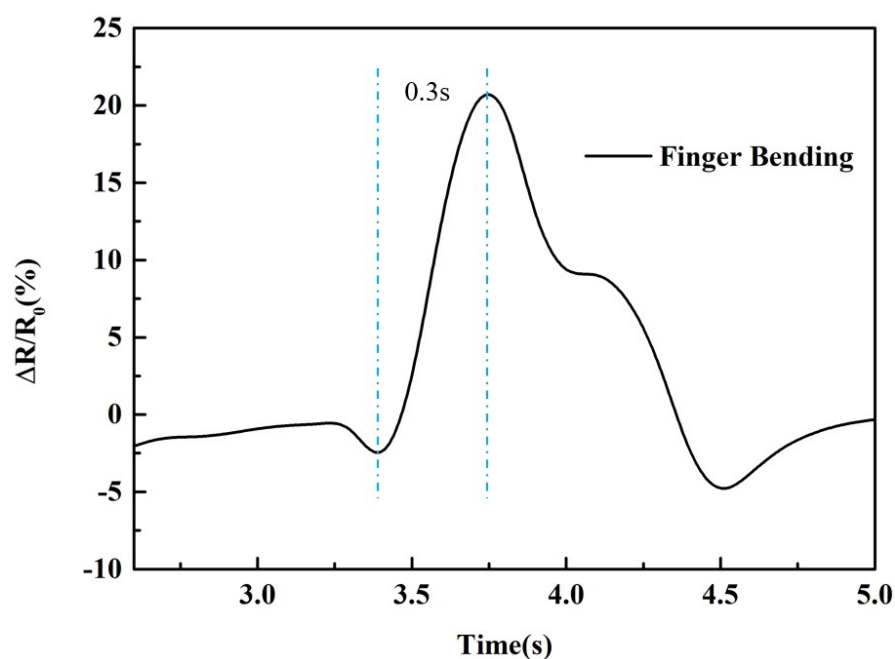

**Fig. S8** The response time of K3-P20 hydrogel to monitor the joint motion of fingers.

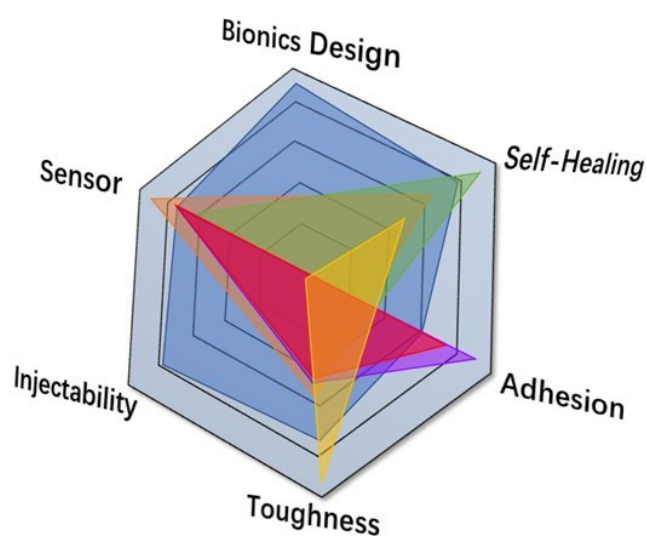

|                                       | Ref.                                                               | Materials                                                                                |
|---------------------------------------|--------------------------------------------------------------------|------------------------------------------------------------------------------------------|
| <span style="color: red;">■</span>    | <i>J. Mater. Chem. C</i> , 2020, <b>8</b> , 8368-8373              | poly(acrylic acid) ionogel                                                               |
| <span style="color: purple;">■</span> | <i>J. Mater. Chem. A</i> , 2019, <b>7</b> , 27099-27109            | polyacrylamide/calcium-alginate/graphene foam hydrogel                                   |
| <span style="color: orange;">■</span> | <i>Mater. Horiz.</i> , 2019, <b>6</b> , 595-603                    | $\kappa$ -carrageenan/polyacrylamide/KCl (ethylene glycol/ glycerol) organohydrogel      |
| <span style="color: green;">■</span>  | <i>ACS Appl. Mater. Interfaces</i> , 2018, <b>10</b> , 19097-19105 | $\kappa$ -carrageenan/polyacrylamide/KCl hydrogel                                        |
| <span style="color: yellow;">■</span> | <i>ACS Appl. Mater. Interfaces</i> , 2018, <b>10</b> , 37544-37554 | $\kappa$ -carrageenan/polyacrylamide/KCl (8 wt % SDS/0.9 M NaCl water solution) hydrogel |
| <span style="color: blue;">■</span>   | This work                                                          | $\kappa$ -carrageenan/poly(ionic liquid)                                                 |

**Fig. S9** Radar charts for comparison of the multifunctionality of different gels based on various materials.

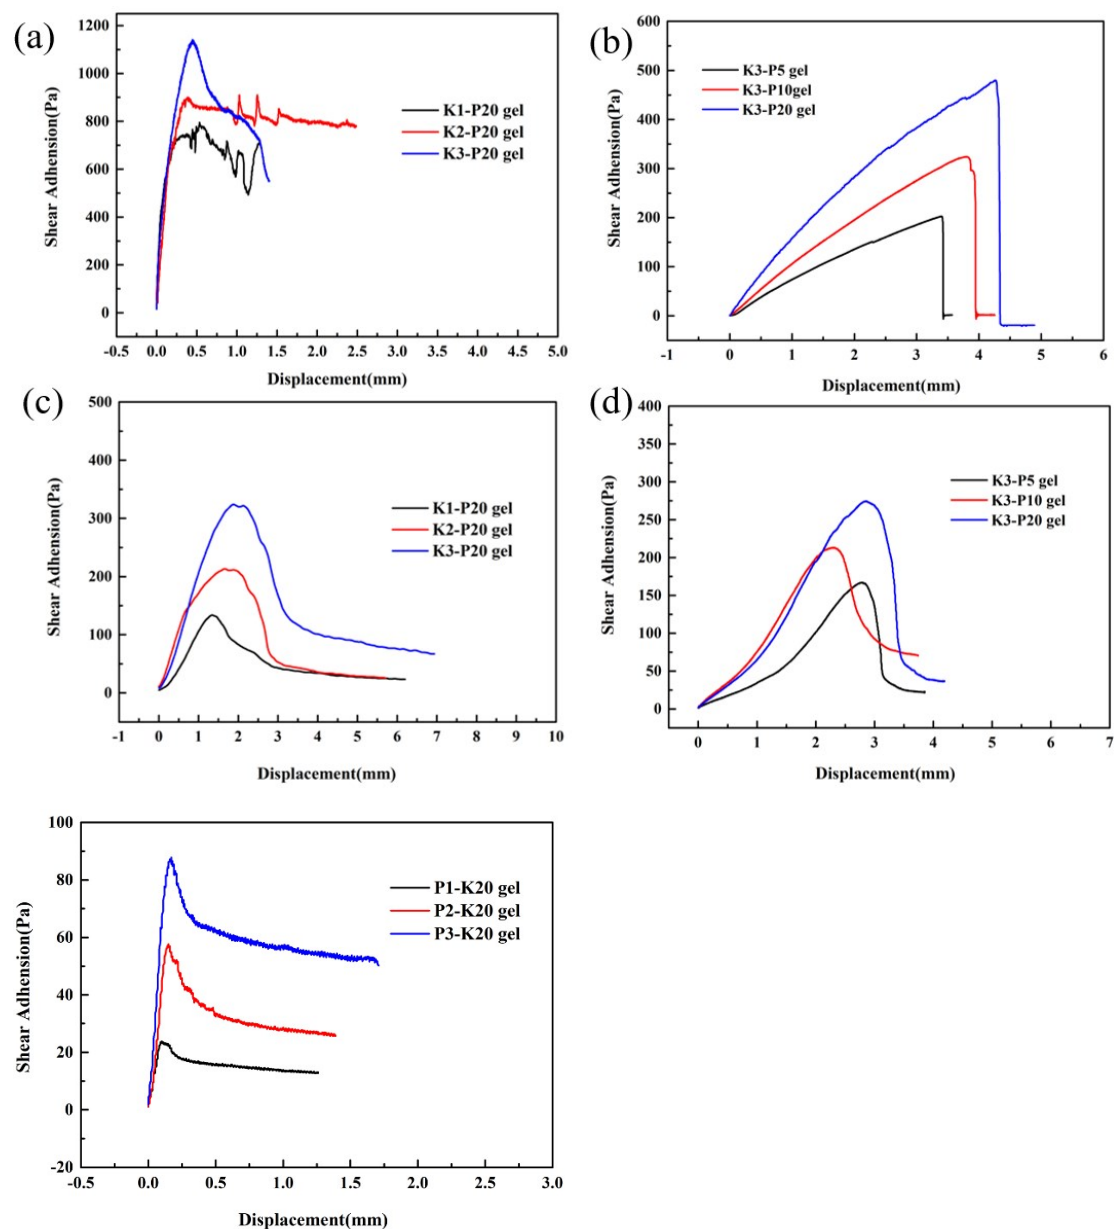

**Fig. S10** Adhesion strength of different hydrogels on various substrates (a)glass, (b) silicone, (c) plastic, (d) hogskin and (e) stainless steel.
